# Supplementary material
Source: Research Square preprint supplement (doi:10.21203/rs.3.rs-9043953/v1)
Supplement: Supplementary file 1 [file 2f03e04f75bed409774471db.docx]

**SUPPLEMENTARY DATA**

*Predictors of Death and Therapeutic Failure in Patients Treated with a*
*Shortened All-Oral Regimen for Multidrug- or Rifampicin-Resistant*
*Tuberculosis (MDR/RR-TB) in Lesotho*

**Appendix A. Exclusion Criteria for Initiation of a Shortened All-Oral Regimen, STEM-TB Lesotho Cohort**

- Inability to take oral medications
- Baseline fluoroquinolone resistance
- Previous fluoroquinolone use longer than one month
- Known fluoroquinolone intolerance
- Baseline TB DST indicating a strain with evidence of resistance against at least two drugs in the all-oral regimen
- Previous exposure to at least two drugs in the all-oral regimen for more than one month
- Isolated extrapulmonary MDR/RR-TB without pulmonary involvement
- Baseline AST or ALT greater than 5 times the upper limit of normal
- Baseline corrected QT interval (per Fridericia's formula) ≥500 milliseconds;
- Known medical contra-indications or allergy to at least two drugs in the all-oral regimen

**Supplementary Figure 1. Flow Diagram of Participant Inclusion in End-of-Treatment and Final Treatment Outcome Analyses, STEM-TB Lesotho Cohort**


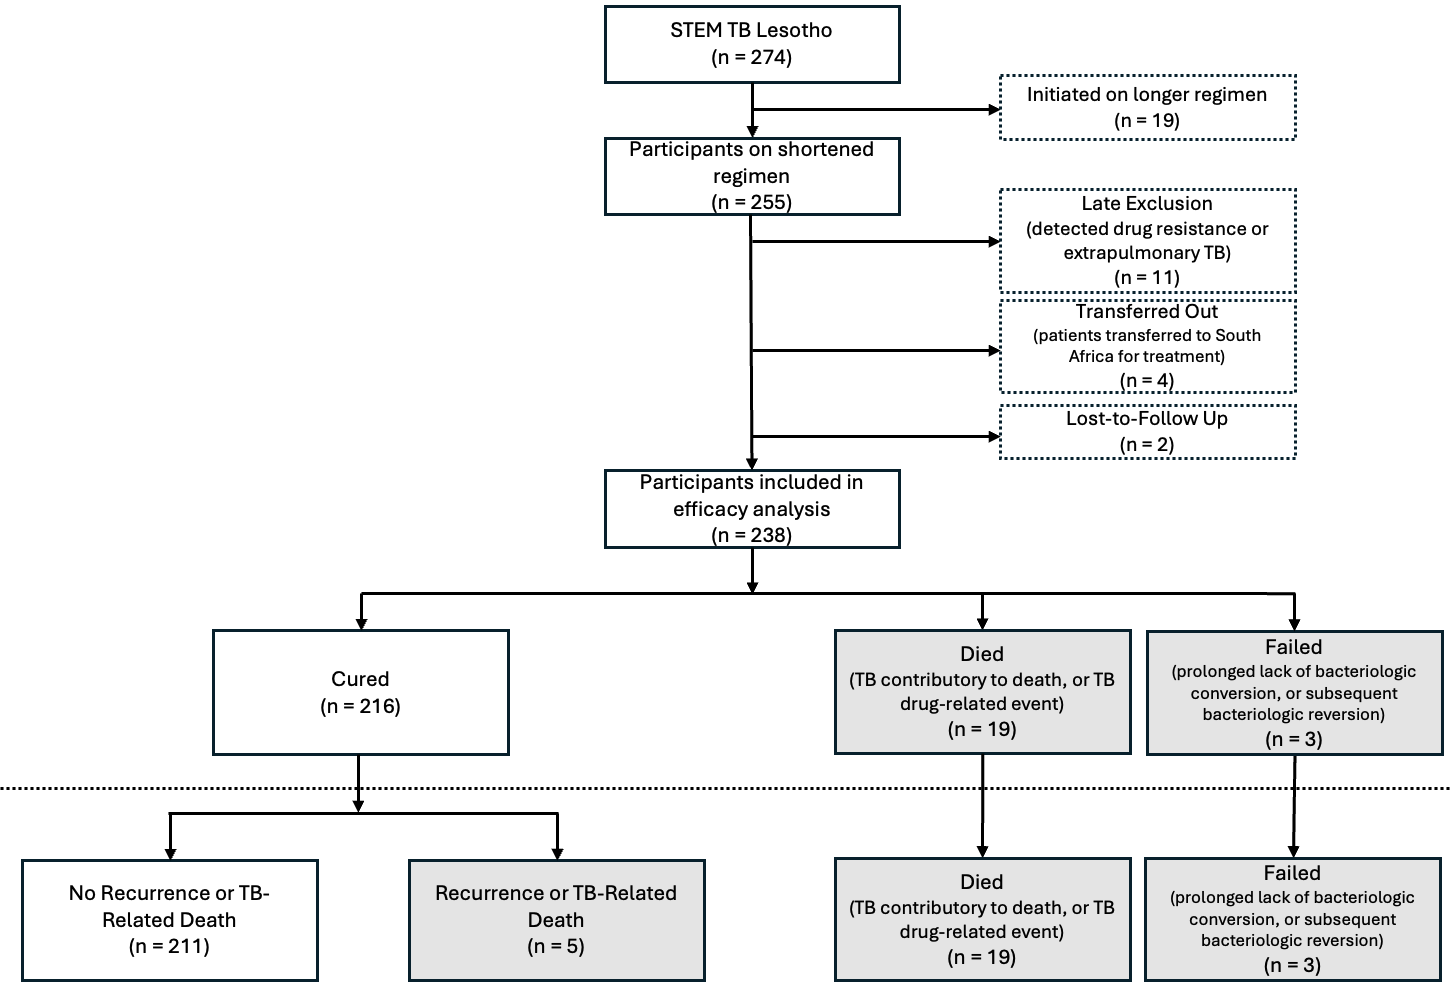


**Supplementary Figure 2. Venn Diagram of Clinical Phenotypes for Participants included in End of Treatment and Final Outcomes Analyses, STEM-TB Lesotho (N = 179)**


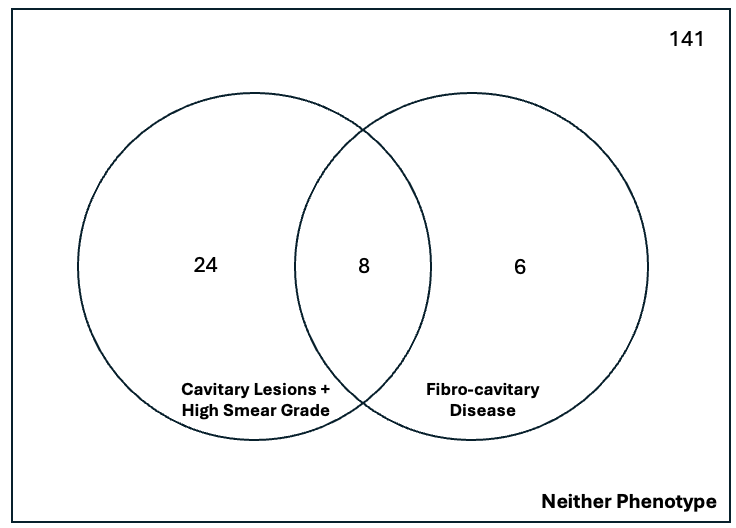


**Supplementary Table 1. Analyses of Baseline Chest X-Ray Findings and Sputum Smear Grade on End of Treatment and Final Post-Treatment Outcomes Among Patients With HIV, Stratified by CD4 Status, STEM-TB Lesotho Cohort**

|  | **Univariable**  Odds Ratio (95% Confidence Interval) | | **Multivariable**  Odds Ratio (95% Confidence Interval) | |
| --- | --- | --- | --- | --- |
|  | **CD4 < 200**  **(N = 65)** | **CD4 ≥ 200**  **(N = 82)** | **CD4 < 200**  **(N = 65)** | **CD4 ≥ 200**  **(N = 82)** |
| **Favorable End-of-Treatment Outcome** | | | | |
| Cavitary Disease | 0.22 | 0.83 | 0.38 | 0.96 |
|  | (0.04 - 1.15) | (0.17 - 3.94) | (0.06 - 2.30) | (0.16 - 6.00) |
| *P-value* | *0.07* | *0.81* | *0.29* | *0.97* |
| Fibrosis | 0.46 | 0.18 | 1.11 | 0.16 |
|  | (0.08 - 2.46) | (0.03 - 0.94) | (0.15 - 8.41) | (0.02 - 1.02) |
| *P-value* | *0.36* | *0.04* | *0.92* | *0.05* |
| Bilateral Disease | 0.24 | 1.21 | 0.31 | 2.09 |
|  | (0.04 - 1.24) | (0.25 - 5.78) | (0.04 - 2.23) | (0.34 - 12.64) |
| *P-value* | *0.09* | *0.81* | *0.25* | *0.42* |
| High Smear Grade | 0.25 | 0.56 | 0.40 | 1.08 |
|  | (0.04 - 1.44) | (0.12 - 2.68) | (0.06 - 2.50) | (0.17 - 6.73) |
| *P-value* | *0.12* | *0.47* | *0.32* | *0.94* |
| **Favorable Final Treatment Outcome** | | | | |
| Cavitary Disease | 0.21 | 0.62 | 0.32 | 0.84 |
|  | (0.05 - 0.92) | (0.14 - 2.73) | (0.05 - 1.78) | (0.15 - 4.72) |
| *P-value* | *0.04* | *0.53* | *0.19* | *0.84* |
| Fibrosis | 0.69 | 0.14 | 2.10 | 0.14 |
|  | (0.14 - 3.46) | (0.03 - 0.69) | (0.26 - 16.82) | (0.02 - 0.83) |
| *P-value* | *0.65* | *0.02* | *0.49* | *0.03* |
| Bilateral Disease | 0.26 | 0.91 | 0.28 | 1.77 |
|  | (0.06 - 1.13) | (0.21 - 4.03) | (0.04 - 1.87) | (0.32 - 9.96) |
| *P-value* | *0.07* | *0.91* | *0.19* | *0.52* |
| High Smear Grade | 0.18 | 0.42 | 0.25 | 0.89 |
|  | (0.03 - 0.97) | (0.10 - 1.85) | (0.04 - 1.50) | (0.16 - 4.95) |
| *P-value* | *0.05* | *0.25* | *0.13* | *0.89* |

Firth logistic regression; missing indicator method applied to all regressions shown.

1 Regressions containing all four features adjusted for each other

**Supplementary Table 2. Analyses of Baseline Chest X-Ray Findings and Sputum Smear Grade on Time to Culture Conversion, Complete Case Analysis, STEM-TB Lesotho Cohort**

|  | **Univariable**  Hazard Ratio (95% Confidence Interval) | | | | | | **Multivariable1**  Hazard Ratio (95% Confidence Interval) | | |
| --- | --- | --- | --- | --- | --- | --- | --- | --- | --- |
|  | **Overall** | | **No HIV** | | **HIV** | | **Overall** | **No HIV** | **HIV** |
|  | **N** | **HR** | **N** | **HR** | **N** | **HR** | (N = 121) | (N = 42) | (N = 79) |
| Cavitary Disease | 129 | 0.75 | 45 | 0.51 | 84 | 0.91 | 0.94 | 0.65 | 1.23 |
|  | (0.52 - 1.09) |  | (0.26 - 0.98) |  | (0.59 - 1.42) | (0.62 - 1.43) | (0.31 - 1.35) | (0.72 - 2.09) |
| *P-value* |  | *0.13* |  | *0.04* |  | *0.67* | *0.77* | *0.24* | *0.44* |
| Fibrosis | 128 | 0.80 | 45 | 0.43 | 83 | 1.21 | 1.04 | 0.51 | 1.562 |
|  | (0.54 - 1.19) |  | (0.22 - 0.84) |  | (0.73 - 2.00) | (0.66 - 1.64) | (0.21 - 1.22) | (0.87 - 2.81) |
| *P-value* |  | *0.26* |  | *0.01* |  | *0.46* | *0.87* | *0.13* | *0.14* |
| Bilateral Disease | 129 | 0.52 | 45 | 0.60 | 84 | 0.46 | 0.58 | 0.93 | 0.47 |
|  | (0.36 - 0.75) |  | (0.32 - 1.15) |  | (0.29 - 0.72) | (0.37 - 0.90) | (0.43 - 2.00) | (0.28 - 0.81) |
| *P-value* |  | *<0.001* |  | *0.12* |  | *0.001* | *0.01* | *0.86* | *0.01* |
| High Smear Grade | 138 | 0.61 | 48 | 0.52 | 90 | 0.66 | 0.79 | 1.03 | 0.68 |
|  | (0.44 - 0.87) |  | (0.29 - 0.96) |  | (0.43 - 1.01) | (0.51 - 1.22) | (0.49 - 2.18) | (0.39 - 1.17) |
| *P-value* |  | *0.01* |  | *0.04* |  | *0.06* | *0.29* | *0.93* | *0.16* |

1 Regressions containing all four features adjusted for each other

**Supplementary Table 3. Analyses of High-Risk Combinatory Chest X-Ray and Sputum Smear Grade Phenotypes on Primary Outcomes, Complete Case Analysis, STEM-TB Lesotho Cohort**

|  | **Time-to-Conversion** | | **Favorable End-of-Treatment Outcome** | | **Favorable Final Treatment**  **Outcome** | |
| --- | --- | --- | --- | --- | --- | --- |
| **Baseline Variable** | **N** | **HR**  **(95% CI)** | **N** | **OR**  **(95% CI)** | **N** | **OR**  **(95% CI)** |
| Both cavitary disease and high smear grade | 122 | 0.57 | 180 | 0.33 | 180 | 0.28 |
|  | (0.37 - 0.88) |  | (0.11 - 0.98) |  | (0.10 - 0.75) |
| *P-value* |  | *0.01* |  | *0.05* |  | *0.01* |
| Severe Fibrocavitary Disease1 | 128 | 0.49 | 206 | 0.20 | 206 | 0.19 |
|  | (0.24 - 1.01) |  | (0.06 - 0.71) |  | (0.06 - 0.62) |
| *P-value* |  | *0.05* |  | *0.01* |  | *0.01* |

1 Participants with large cavitations (>5cm) and any concomitant degree of both fibrosis, or multi-lobar fibrosis and any concomitant degree of cavitation

**Supplementary Table 4. Analysis of Baseline Chest X-Ray Findings and Sputum Smear Grade on Primary Outcomes, Complete Case Analysis, STEM-TB Lesotho Cohort**

|  | **Univariable**  Odds Ratio (95% Confidence Interval) | | | | | | **Multivariable1**  Odds Ratio (95% Confidence Interval) | | |
| --- | --- | --- | --- | --- | --- | --- | --- | --- | --- |
|  | **Overall** | | **No HIV** | | **HIV** | | **Overall** | **No HIV** | **HIV** |
|  | **N** | **OR** | **N** | **OR** | **N** | **OR** | **(N=179)** | **(N=71)** | **(N=108)** |
| **End-of-Treatment Outcome** | | | | | | | | | |
| **Cavitary Disease** | 207 | 0.39 | 81 | 0.28 | 126 | 0.48 | 0.62 | 0.35 | 0.86 |
|  | (0.15 - 1.02) |  | (0.06 - 1.35) |  | (0.15 - 1.59) | (0.19 - 2.07) | (0.05 - 2.51) | (0.18 - 4.20) |
| *P-value* |  | *0.05* |  | *0.11* |  | *0.23* | *0.44* | *0.30* | *0.85* |
| **Fibrosis** | 206 | 0.28 | 81 | 0.34 | 125 | 0.25 | 0.30 | 0.47 | 0.25 |
|  | (0.11 - 0.76) |  | (0.07 - 1.64) |  | (0.07 - 0.87) | (0.09 - 0.97) | (0.06 - 3.36) | (0.06 - 1.12) |
| *P-value* |  | *0.01* |  | *0.18* |  | *0.03* | *0.04* | *0.45* | *0.07* |
| **Bilateral Disease** | 207 | 0.37 | 81 | 0.14 | 126 | 0.54 | 0.72 | 0.32 | 0.97 |
|  | (0.13 - 1.00) |  | (0.02 - 1.24) |  | (0.16 - 1.80) | (0.21 - 2.51) | (0.03 - 3.60) | (0.21 - 4.59) |
| *P-value* |  | *0.05* |  | *0.08* |  | *0.31* | *0.60* | *0.36* | *0.97* |
| **High Smear Grade** | 206 | 0.39 | 80 | 0.42 | 126 | 0.38 | 0.95 | 0.90 | 1.02 |
|  | (0.15 - 1.07) |  | (0.08 - 2.26) |  | (0.11 - 1.33) | (0.29 - 3.10) | (0.14 - 5.88) | (0.22 - 4.85) |
| *P-value* |  | *0.07* |  | *0.31* |  | *0.13* | *0.94* | *0.92* | *0.98* |
| **Final Post-Treatment Outcome** | | | | | | | | | |
| **Cavitary Disease** | 207 | 0.35 | 81 | 0.29 | 126 | 0.40 | 0.51 | 0.35 | 0.60 |
|  | (0.15 - 0.84) |  | (0.07 - 1.18) |  | (0.14 - 1.20) | (0.17 - 1.53) | (0.06 – 1.99) | (0.14 - 2.54) |
| *P-value* |  | *0.02* |  | *0.08* |  | *0.10* | *0.23* | *0.23* | *0.49* |
| **Fibrosis** | 206 | 0.32 | 81 | 0.35 | 125 | 0.29 | 0.36 | 0.54 | 0.32 |
|  | (0.13 - 0.77) |  | (0.09 - 1.44) |  | (0.09 - 0.91) | (0.13 - 1.02) | (0.10 - 3.02) | (0.08 - 1.24) |
| *P-value* |  | *0.01* |  | *0.15* |  | *0.03* | *0.06* | *0.48* | *0.10* |
| **Bilateral Disease** | 207 | 0.31 | 81 | 0.10 | 126 | 0.49 | 0.48 | 0.16 | 0.80 |
|  | (0.12 - 0.79) |  | (0.01 - 0.84) |  | (0.16 - 1.47) | (0.15 - 1.55) | (0.02 - 1.55) | (0.19 - 3.45) |
| *P-value* |  | *0.01* |  | *0.03* |  | *0.20* | *0.22* | *0.11* | *0.77* |
| **High Smear Grade** | 206 | 0.40 | 80 | 0.73 | 126 | 0.27 | 1.02 | 1.87 | 0.70 |
|  | (0.16 - 0.98) |  | (0.16 - 3.34) |  | (0.08 - 0.88) | (0.35 - 2.98) | (0.32 - 10.88) | (0.17 - 2.85) |
| *P-value* |  | *0.05* |  | *0.69* |  | *0.03* | *0.97* | *0.49* | *0.62* |

1 Regressions containing all four features adjusted for each other

**Supplementary Table 5. Analyses of High-Risk Combinatory Chest X-Ray and Sputum Smear Grade Phenotypes on Primary Outcomes, Lost to Follow-Up Sensitivity Analysis** 1**, STEM-TB Lesotho Cohort (N = 240)**

|  | **Favorable End-of-Treatment Outcome** | **Favorable Final Treatment Outcome** |
| --- | --- | --- |
| **Baseline Variable** | Odds Ratio  (95% Confidence Interval) | Odds Ratio  (95% Confidence Interval) |
| Both cavitary disease and high smear grade | 0.39 | 0.32 |
| (0.14 - 1.14) | (0.12 - 0.85) |
| *P-value* | *0.09* | *0.02* |
| Severe Fibrocavitary Disease2 | 0.24 | 0.22 |
| (0.07 - 0.84) | (0.07 - 0.71) |
| *P-value* | *0.03* | *0.01* |

1 Two participants with “lost to follow-up” outcome status included as having had unfavorable end of treatment and final post-treatment outcomes.

2 Participants with large cavitations (>5cm) and any concomitant degree of both fibrosis, or multi-lobar fibrosis and any concomitant degree of cavitation

**Supplementary Table 6. Analysis of Baseline Chest X-Ray Findings and Sputum Smear Grade on Primary Outcomes, Lost to Follow-Up Sensitivity Analysis, STEM-TB Lesotho Cohort (N = 240)**

|  | **Univariable**  Odds Ratio (95% Confidence Interval) | | **Multivariable**  Odds Ratio (95% Confidence Interval) | |
| --- | --- | --- | --- | --- |
|  | **Overall**  **(N = 240)** | **HIV**  **(N = 150)** | **Overall**  **(N = 240)** | **HIV**  **(N = 150)** |
| **Favorable End-of-Treatment Outcome** | | | | |
| Cavitary Disease | 0.48 | 0.64 | 0.80 | 1.01 |
|  | (0.19 - 1.19) | (0.21 - 1.98) | (0.28 - 2.25) | (0.281 - 3.605) |
| *P-value* | *0.11* | *0.44* | *0.67* | *0.99* |
| Fibrosis | 0.39 | 0.39 | 0.53 | 0.48 |
|  | (0.16 - 0.97) | (0.13 - 1.24) | (0.20 - 1.43) | (0.14 - 1.65) |
| *P-value* | *0.04* | *0.11* | *0.21* | *0.25* |
| Bilateral Disease | 0.49 | 0.75 | 0.72 | 1.08 |
|  | (0.19 - 1.23) | (0.25 - 2.29) | (0.25 - 2.06) | (0.30 - 3.87) |
| *P-value* | *0.13* | *0.62* | *0.54* | *0.90* |
| High Smear Grade | 0.32 | 0.29 | 0.41 | 0.31 |
|  | (0.12 - 0.84) | (0.09 - 0.93) | (0.15 - 1.15) | (0.09 - 1.10) |
| *P-value* | *0.02* | *0.04* | *0.09* | *0.07* |
| **Favorable Final Treatment Outcome** | | | | |
| Cavitary Disease | 0.42 | 0.52 | 0.71 | 0.85 |
|  | (0.18 - 0.96) | (0.18 - 1.46) | (0.28 - 1.81) | (0.26 - 2.74) |
| *P-value* | *0.04* | *0.21* | *0.47* | *0.78* |
| Fibrosis | 0.40 | 0.42 | 0.59 | 0.56 |
|  | (0.17 - 0.93) | (0.14 - 1.20) | (0.24 - 1.47) | (0.18 - 1.75) |
| *P-value* | *0.03* | *0.11* | *0.26* | *0.32* |
| Bilateral Disease | 0.40 | 0.65 | 0.58 | 0.98 |
|  | (0.17 - 0.95) | (0.23 - 1.82) | (0.22 - 1.53) | (0.30 - 3.19) |
| *P-value* | *0.04* | *0.41* | *0.27* | *0.97* |
| High Smear Grade | 0.33 | 0.22 | 0.46 | 0.25 |
|  | (0.14 - 0.81) | (0.07 - 0.68) | (0.18 - 1.19) | (0.07 - 0.84) |
| *P-value* | *0.02* | *0.01* | *0.11* | *0.03* |

Two participants with an outcome of lost to follow-up included as having had unfavorable end-of-treatment and final treatment outcomes. Both participants who were lost to follow-up were living with HIV.
